# Supplementary material for: Graphene oxide-stabilized perfluorocarbon emulsions for controlled oxygen delivery
Source: Royal Society of Chemistry journal article supplement (doi:10.1039/c7nr00378a), 2017-01-01
Supplement: c7nr00378a1.pdf [file c7nr00378a1.pdf]

## Graphene oxide-stabilized perfluorocarbon emulsions for controlled oxygen delivery

Ghulam Jalani, Dhanalakshmi Jeyachandran, Richard Church and Marta Cerruti

Contents: Figure S1 -S5

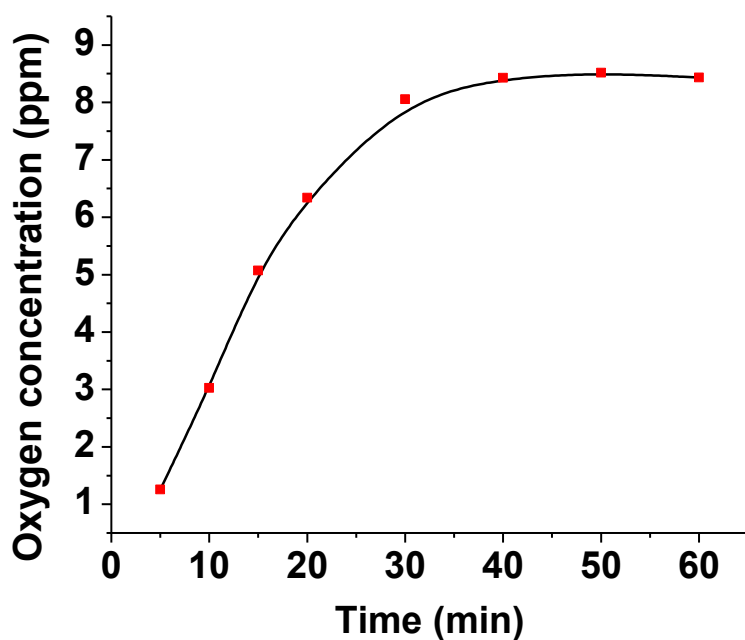

**Figure S1:** Measurement of saturation oxygen concentration in pure PFC perfused with air for different times ranging from 5-60 min. These results were used to estimate the time required to fully saturate the PFCs.

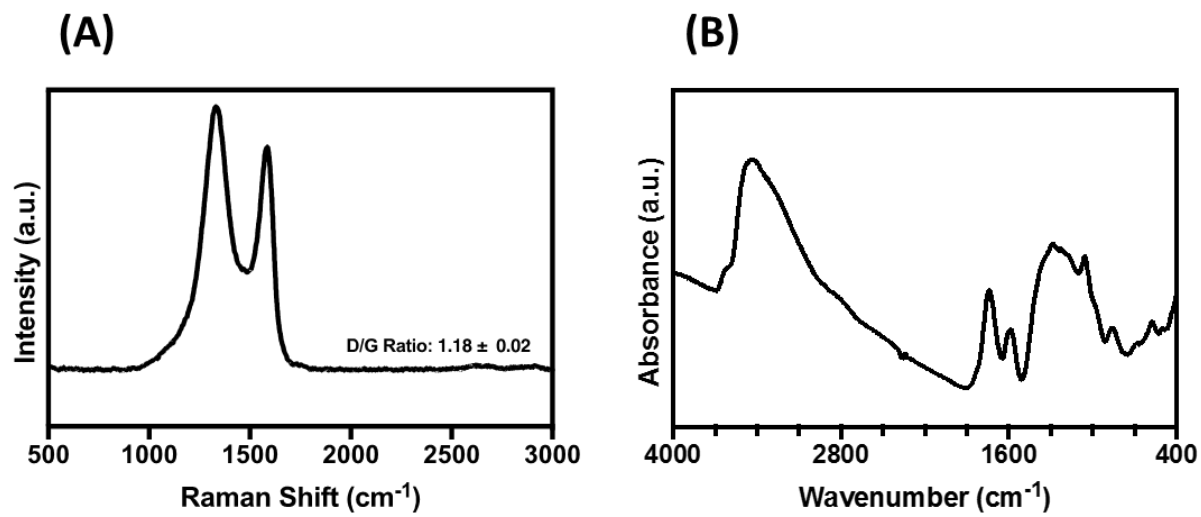

**Figure S2.** Raman (A) and (B) FTIR spectrum of GO used to prepare PFC emulsions.

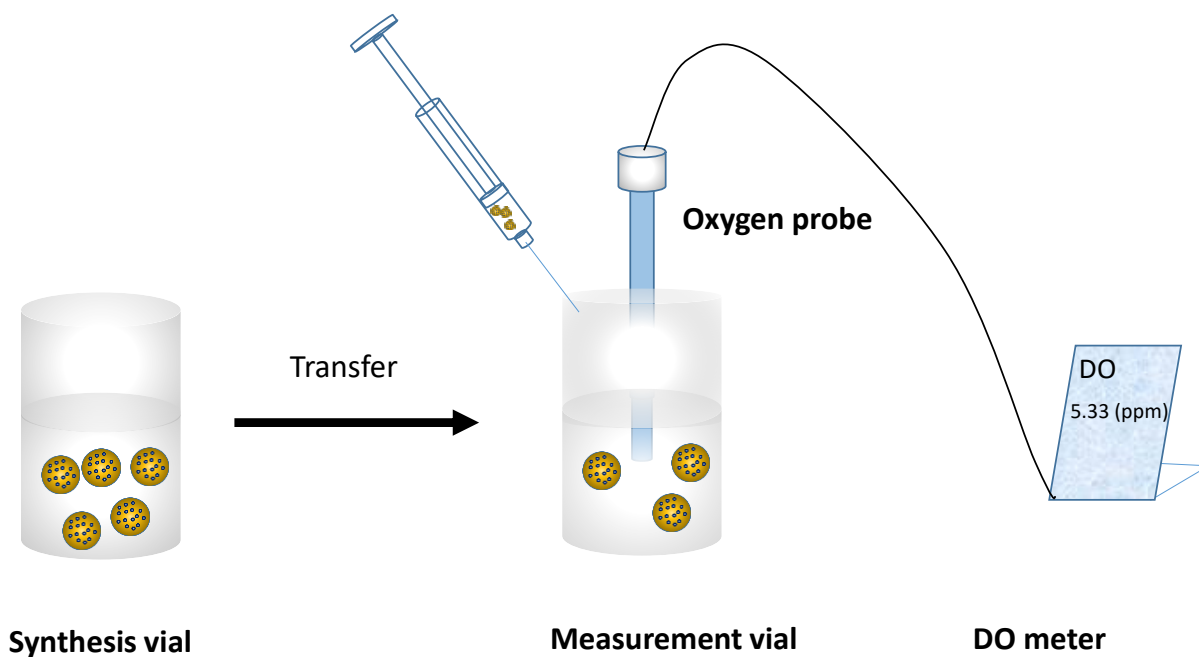

**Figure S3:** Schematic showing the procedure used to measure oxygen release from the emulsions. Emulsions are prepared in the synthesis vial and then transferred to the measurement vial where an oxygen probe continuously monitors the release of oxygen as a function of time.

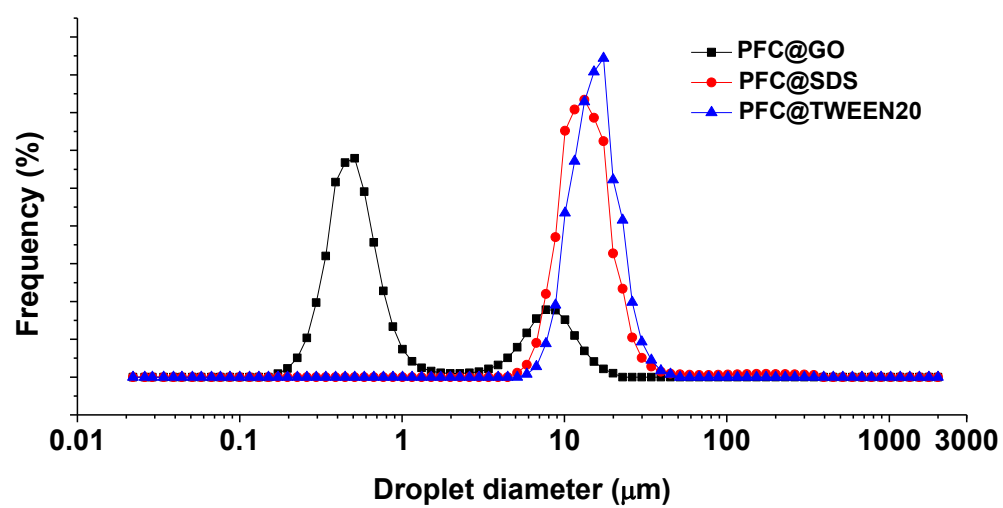

**Figure S4.** Complete size distribution plots of PFC@GO (black line), PFC@SDS (red line) and PFC@TWEEN20 (blue line) prepared at a surfactant concentration of 0.01% w/v.

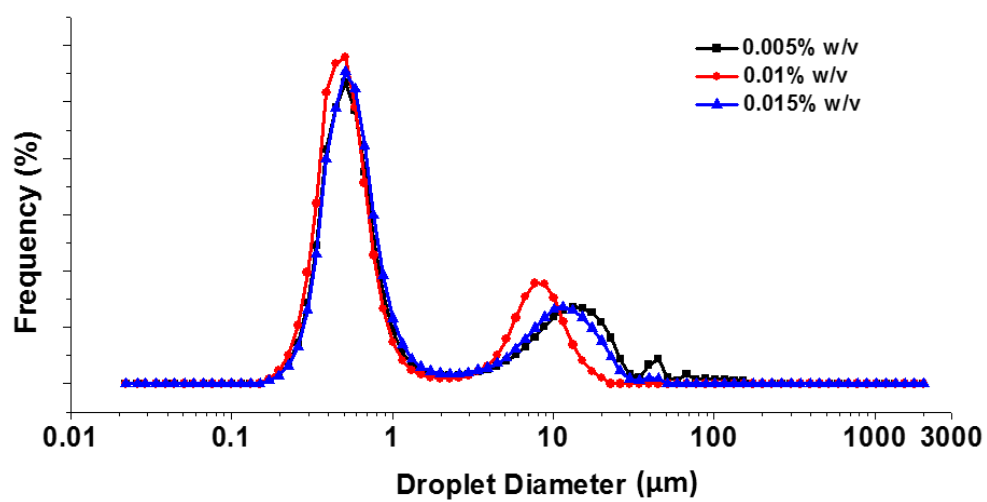

**Figure S5.** Droplet size distribution of PFC@GO prepared with variable amounts of GO.
